# Supplementary material
Source: publisher figshare collection journal article supplement (https://karger.figshare.com/articles/dataset/_/28582592)

**SUPPLEMENTARY MATERIAL**

**Sample Exclusions**

There were 416 participant responses to the survey. Ultimately, 322 participants were included in the final datasets, and 94 were excluded for the reasons detailed below. Of the original group, 383 participants finished the survey. The other 33 participants who did not complete the survey were excluded. In response to the question “Do you agree to be honest in all your responses?” one participant answered “No” and was excluded. In response to the question “Did you look up the answers to any questions throughout the course of the survey?”, 39 participants answered “Yes,” and were excluded. In response to the prompt, “Scientific studies like this one depend upon having accurate data. If there is any reason why you believe we should not use your data, please indicate below,” 21 participants selected “There is a reason to exclude my data” and were excluded. The 322 participants remaining were included in the final data set.


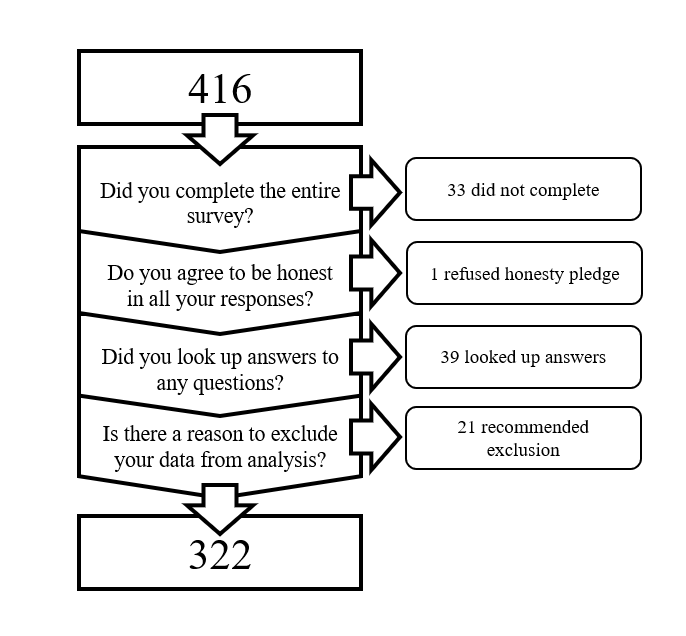

Supplement: Supplementary file 1 [file 1]
